# Supplementary material for: Ginsenoside CK ameliorates hepatic lipid accumulation via activating the LKB1/AMPK pathway in vitro and in vivo
Source: Royal Society of Chemistry journal article supplement (doi:10.1039/d1fo03026d), 2021-12-15
Supplement: d1fo03026d1.pdf [file d1fo03026d1.pdf]

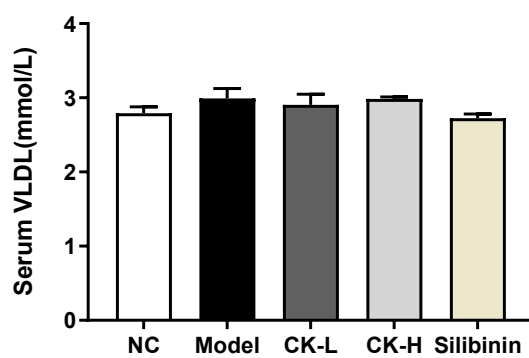

**Fig. S1** Effects of ginsenoside CK on serum VLDL in different groups. Data are presented as the mean  $\pm$  SEM.  $P < 0.05$  was considered to indicate statistical significance.
